# Supplementary material for: Effects of active compounds from Cassia fistula on quorum sensing mediated virulence and biofilm formation in Pseudomonas aeruginosa
Source: Royal Society of Chemistry journal article supplement (doi:10.1039/d1ra08351a), 2022-01-01
Supplement: d1ra08351a1.pdf [file d1ra08351a1.pdf]

## Supporting information 1

# Effects of Active compounds from *Cassia fistula* on Quorum sensing mediated virulence and biofilm formation in *Pseudomonas aeruginosa*

## Supplementary Method 1 (S Method 1)

### Nematode culture maintenance

*In-vivo* bacterial pathogenesis was studied on the model organism *Caenorhabditis elegans*. The wild-type *Caenorhabditis elegans* (Bristol) N2 strain was utilised to employ paralytic, slow and fast killing assays. Before conducting the experiments, *Caenorhabditis elegans* N2 hermaphrodite worms were synchronized with hypochlorite (1% sodium hypochlorite). Nematodes were allowed to grow on NGM plates, with *E. coli* OP50 being used as their food. The hatched eggs were transferred onto the previously seeded *E. coli* OP50 on NGM plates (Brenner, 1974), following which incubation was done for 3-4 days at 21 °C. Finally, the synchronized L4-stage worms were used in subsequent assays. Worms were observed using a stereomicroscope (Magnus) <sup>1-3</sup>.

### References

- (1) Cezairliyan, B.; Vinayavekhin, N.; Grenfell-Lee, D.; Yuen, G. J.; Saghatelian, A.; Ausubel, F. M. Identification of *Pseudomonas Aeruginosa* Phenazines That Kill *Caenorhabditis Elegans*. *PLoS Pathog.* **2013**, *9* (1).  
<https://doi.org/10.1371/journal.ppat.1003101>.
- (2) Gallagher, L. A.; Manoil, C. *Pseudomonas Aeruginosa* PAO1 Kills *Caenorhabditis Elegans* by Cyanide Poisoning. *J. Bacteriol.* **2001**, *183* (21), 6207–6214.  
<https://doi.org/10.1128/JB.183.21.6207>.
- (3) Tan, M. W.; Mahajan-Miklos, S.; Ausubel, F. M. Killing of *Caenorhabditis Elegans* by *Pseudomonas Aeruginosa* Used to Model Mammalian Bacterial Pathogenesis. *Proc. Natl. Acad. Sci. U. S. A.* **1999**, *96* (2), 715–720. <https://doi.org/10.1073/pnas.96.2.715>.

# Results

## Supplementary figure 1 (S Fig. 1)

### Flash chromatography chromatogram-

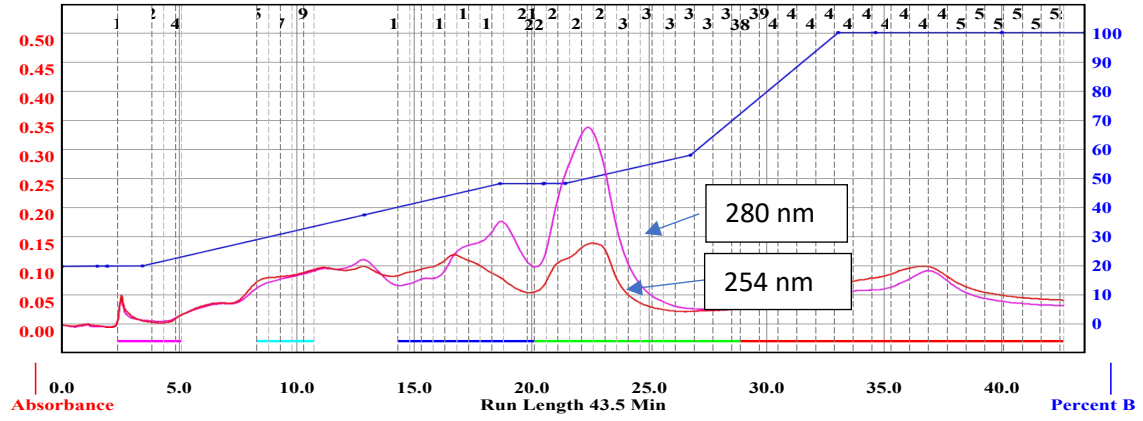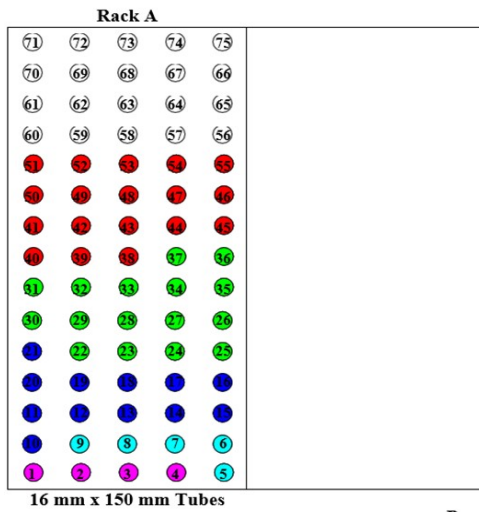

**Supplementary Table 1 (S Table 1) - Flash chromatography mobile phase table -**

| Peak # | Start Tube | End Tube |
|--------|------------|----------|
| 1      | A:1        | A:4      |
| 2      | A:5        | A:9      |
| 3      | A:10       | A:21     |
| 4      | A:22       | A:37     |
| 5      | A:38       | A:55     |

| Duration | % B  | Solvent A | Solvent B        |
|----------|------|-----------|------------------|
| 0.0      | 20.0 | A1 hexane | B1 ethyl acetate |
| 1.5      | 20.1 | A1 hexane | B1 ethyl acetate |
| 0.4      | 20.1 | A1 hexane | B1 ethyl acetate |
| 0.0      | 20.1 | A1 hexane | B1 ethyl acetate |
| 1.5      | 20.2 | A1 hexane | B1 ethyl acetate |
| 9.4      | 37.6 | A1 hexane | B1 ethyl acetate |
| 5.8      | 48.3 | A1 hexane | B1 ethyl acetate |
| 1.8      | 48.3 | A1 hexane | B1 ethyl acetate |
| 0.0      | 48.3 | A1 hexane | B1 ethyl acetate |
| 0.0      | 48.4 | A1 hexane | B1 ethyl acetate |
| ...      | ...  | ...       | ...              |

**Supplementary figure 2 (S Fig. 2) Short-chain assay**

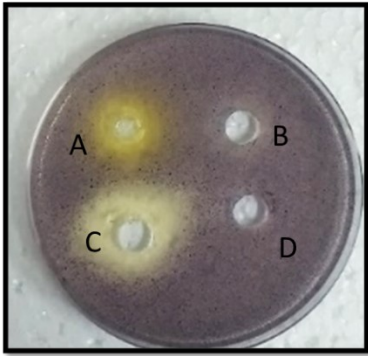

**S Figure 2.** Plate based Short chain assay where (A) F-1 ( $1 \text{ mg ml}^{-1}$ ), (B) DMSO, (C) AZM ( $4 \mu\text{g l}^{-1}$ ), (D) PBS:EtoH (1:1)

### Supplementary figure 3 (S Fig. 3)

LC MS linearity and quantification was performed and a calibration curve was plotted for each concentration (ranging from 32 ng ml<sup>-1</sup> to 2500 ng ml<sup>-1</sup> in F-1), comparing the peak area ratio to the internal standard (Rhein).

| RHEIN LINEARITY |                |           |             |        |           |          |             |             |            |            |             |            |       |
|-----------------|----------------|-----------|-------------|--------|-----------|----------|-------------|-------------|------------|------------|-------------|------------|-------|
| Data#           | Data File Name | Ret. Time | Sample Type | Level# | Area      | S/N      | Sample Name | Accuracy[%] | Cal. Point | Area Ratio | Conc. (ppm) | Std. Conc. | Area% |
| 1               | RHEIN 32NG     | 2.358     | Standard(Ca |        | 31,313    | 37.17    | RHEIN 32NG  | 184.7       | 1          | ---        | 59.11       | 32         | 100   |
| 2               | RHEIN 64NG     | 2.365     | Standard(Ca |        | 65,904    | 67.21    | RHEIN 64NG  | 130.9       | 1          | ---        | 83.775      | 64         | 100   |
| 3               | RHEIN 125N     | 2.366     | Standard(Ca |        | 139,031   | 144.86   | RHEIN 125N  | 108.7       | 1          | ---        | 135.918     | 125        | 100   |
| 4               | RHEIN 250N     | 2.36      | Standard(Ca |        | 328,472   | 324.79   | RHEIN 250N  | 108.4       | 1          | ---        | 270.999     | 250        | 100   |
| 5               | RHEIN 500N     | 2.36      | Standard(Ca |        | 573,056   | 493.8    | RHEIN 500N  | 89.1        | 1          | ---        | 445.4       | 500        | 100   |
| 6               | RHEIN 1000     | 2.358     | Standard(Ca |        | 1,276,929 | 810.06   | RHEIN 1000  | 94.7        | 1          | ---        | 947.296     | 1000       | 100   |
| 7               | RHEIN 2500     | 2.361     | Standard(Ca |        | 3,494,454 | 1,290.49 | RHEIN 2500  | 101.1       | 1          | ---        | 2,528.50    | 2500       | 100   |

| MRM EVENTS            |               | RHEIN MRM PRECURSSOR |                   |                      |      |                |  |
|-----------------------|---------------|----------------------|-------------------|----------------------|------|----------------|--|
| MRM                   |               | Acq. Time: 0 - 5 min |                   | Compound Name: RHEIN |      |                |  |
| Ch                    | Precursor m/z | Product m/z          | Dwell Time (msec) | Q1 Pre Bias(V)       | CE   | Q3 Pre Bias(V) |  |
| Ch1                   | 283.20        | 239.00               | 100.0             | 20.0                 | 14.0 | 25.0           |  |
| Ch2                   | 283.20        | 183.00               | 100.0             | 20.0                 | 30.0 | 30.0           |  |
| Ch3                   | 283.20        | 210.95               | 100.0             | 20.0                 | 25.0 | 21.0           |  |
| Ch4                   |               |                      |                   |                      |      |                |  |
| Ch5                   |               |                      |                   |                      |      |                |  |
| Event Time: 0.309 sec |               | Q1 Resolution: Unit  |                   | Advanced Settings... |      |                |  |
|                       |               | Q3 Resolution: Unit  |                   |                      |      |                |  |

**Supplementary Table 2 (S Table 2) PCR primers used for RT-PCR**

| Gene Name     | Primer sequence        | Annealing temp | Amplicon size (bp) |
|---------------|------------------------|----------------|--------------------|
| <i>lasI F</i> | GGCTGGGACGTTAGTGTCAT   | 55 ° C         | 104                |
| <i>lasI R</i> | AAAACCTGGGCTTCAGGAGT   |                |                    |
| <i>lasR F</i> | ACGCTCAAGTGGAAAATTGG   | 59 ° C         | 111                |
| <i>lasR R</i> | TCGTAGTCCTGGCTGTCCTT   |                |                    |
| <i>rhlI F</i> | AAGGACGTCTTCGCCTACCT   | 60.5 ° C       | 130                |
| <i>rhlI R</i> | GCAGGCTGGACCAGAATATC   |                |                    |
| <i>rhlR F</i> | CATCCGATGCTGATGTCCAACC | 65 ° C         | 101                |
| <i>rhlR R</i> | ATGATGGCGATTCCCCGGAAC  |                |                    |
| <i>rpsL F</i> | GCAACTATCAACCAGCTGGTG  | 65 ° C         | 2321               |
| <i>rpsL R</i> | GCTGTGCTCTGCAGGTTGTG   |                |                    |

**Supplementary Table 3 (S Table 3) Peptone-Glucose-Sorbitol (PGS) Media Composition**

| Chemicals       | For 100 ml |
|-----------------|------------|
| Bacto-Peptone   | 1%         |
| Glucose         | 1%         |
| Sodium Chloride | 1%         |
| Sorbitol        | 0.15%      |

**Supplementary Table 4 (S Table 4) Nematode Growth Medium (NGM) Composition**

| Chemicals                                                                                                                                           | For 1 litre |
|-----------------------------------------------------------------------------------------------------------------------------------------------------|-------------|
| NaCl                                                                                                                                                | 3 gm        |
| Agar                                                                                                                                                | 17 gm       |
| Peptone                                                                                                                                             | 2.5 gm      |
| 5 mg ml <sup>-1</sup> cholesterol in ethanol (Do not autoclave)                                                                                     | 1 ml        |
| 1 M KPO <sub>4</sub> buffer pH 6.0 (108.3 g KH <sub>2</sub> PO <sub>4</sub> , 35.6 g K <sub>2</sub> HPO <sub>4</sub> , H <sub>2</sub> O to 1 litre) | 25 ml       |
| Calcium chloride                                                                                                                                    | 1 ml        |
| 1M Magnesium sulfate                                                                                                                                | 1 ml        |

**Supplementary Table 5 (S Table 5): Docking interaction score for active constituents of *Cassia fistula* and standard (Rhein) used in the study against *LasI* and *LasR***

| <b>Compounds</b>                           | <b>Binding energy with <i>LasI</i> (1RO5)<br/>(kcal mol<sup>-1</sup>)</b> | <b>Binding energy with <i>LasR</i> (2UV0)<br/>(kcal mol<sup>-1</sup>)</b> |
|--------------------------------------------|---------------------------------------------------------------------------|---------------------------------------------------------------------------|
| Rhein                                      | -10.258                                                                   | -10.21                                                                    |
| 3-Aminodibenzofuran                        | -6.052                                                                    | -8.923                                                                    |
| 9-Octadecenamide                           | -4.32                                                                     | -7.062                                                                    |
| Methyl Stearate                            | -3.987                                                                    | -6.599                                                                    |
| Methyl Linoleate                           | -3.96                                                                     | -6.548                                                                    |
| 5-(Hydroxymethyl)-2-(dimethoxymethyl)furan | -6.67                                                                     | -5.762                                                                    |
| Dihydrorhodamine                           | -6.521                                                                    | -5.587                                                                    |
| 1- Eicosene                                | -5.016                                                                    | -4.461                                                                    |
| Methyl Oleate                              | -5.746                                                                    | -4.427                                                                    |
| Methyl Palmitate                           | -3.15                                                                     | -4.081                                                                    |
| palmitic acid                              | -4.259                                                                    | -3.937                                                                    |
| 1-Octadecene                               | -1.453                                                                    | -3.827                                                                    |
| Tetradecane                                | -1.876                                                                    | -2.504                                                                    |
| 2,4-Di-tert-butylphenol                    | -2.783                                                                    | -2.112                                                                    |
| 1-Nonanol                                  | -1.612                                                                    | -1.819                                                                    |
